# Supplementary material for: Unique Loss of the PYHIN Gene Family in Bats Amongst Mammals: Implications for Inflammasome Sensing
Source: PubMed Central journal article supplement (PMC4764838; doi:10.1038/srep21722), 2016-02-24
Supplement: srep21722-s1.pdf [file srep21722-s1.pdf]

## **Supplementary Information**

for

Unique Loss of the PYHIN Gene Family in Bats Amongst Mammals: Implications for  
Inflammasome Sensing

Matae Ahn, Jie Cui, Aaron T. Irving & Lin-Fa Wang\*

Programme in Emerging Infectious Diseases, Duke–National University of Singapore  
Medical School, Singapore

\* Corresponding author

Email: [linfa.wang@duke-nus.edu.sg](mailto:linfa.wang@duke-nus.edu.sg) (L-FW)

## Supplementary Data S1. PYRIN domain alignment sequences

>Armadillo\_AIM2  
KEILLKGLDDITDEELQKFKFLLRDVLSSTGKLEKANRTEVADLMIQNAGG  
VSALDKTIAIFQKL-NYMHQAKILK-

>Armadillo\_MNDA  
KKIVLLKGFEAISDYHFNTIKSLLASDLKLTKKMQDDYDRIKIADLMEKKFPG  
PTCVDKLIELLKDIPSLKDIVETLRK

>Chimpanzee\_AIM2  
KEILLTGLDNITDEELDRFKFLLSDEFNIATGKLHTANRIQVANLMIQNAGAV  
SAVMKTIRIFQKL-NYMLLAKRLQE

>Chimpanzee\_AIM2l  
KEILLTSLDNITDEELDRCKCFLPDDFNIATGKLHTGNSTSSQLDLKRWRGV-  
-  
CSEEDGIFQKL-NYMLVAKCLRE

>Chimpanzee\_IFI16  
KNIVLLKGLEVINDYHFRMVKSLLSNDLKLNLKMREEYDKIQIADLMEEKFR  
GDAGLGKLIQIFKDIPTLEDLAETLKK

>Chimpanzee\_MNDA  
KKILLKGFELMDDYHFTTIKSLLAYDLGLTTKMQUEEYNRIKITDLMEKKFQG  
VACLDKLIELAKDMPSLKNLVNLRK

>Chimpanzee\_PYHIN1  
KKIVLLKGLEVINDYHFRIVKSLLSNDLKLNPKMKEEYDKIQIADLMEEKFPG  
DAGLGKLIIEFFKEIPTLGDLAETLKR

>Cow\_1  
KKIVLLKGFQHQHINDKCFNMIKSLLAHDCLKLTRKMQDEYDRVKIADLMELKFR  
GPDCVDKLIELVKEIDEIKDLAKVLRK

>Dog\_1  
KKIILLKGLEPINDYQFSIVKSVLARDLGLTANMQEEYNKVKIADLMEEKFPG  
VACVNKLIDLFKEMPSLTDIVKQLRN

>Dog\_2  
KKIILLKGLEPINDYQFSIVKSVLARDLGLTANMQKEYNKVKIADLMEEKFPG  
VACVNKLIDLFKEMQDCEDI-----

>Dolphin\_1  
KRIVLLKGFQHIKDYQFSMIKSLLARDLRLTSKMQDDYDRIKIADLMEVRYPG  
AACVEKLIDLIKDIEELKDLAKTLRK

>Elephant\_1  
KKIVLLKGLEEINDYHFYIVKSLLAHDRLXPKVQEEHDTIKIADLMAEKFPGI  
ACVDKLELLKDIKDL-----

>Elephant\_2  
KKIVLLKGLSINDYQFNTIKSLLARDLQLTKKMQDEYDRIKIADLMEEKFRG  
AASVDKLIELFKDMPQLKDLAKSLR-

>Elephant\_3  
KKILLKGLQPISEYQFNMVKSVLADLQLNKKQAQYGYNKIQIADLMEDKFP  
GATCLDILIELFEDIEGLKDLAKTLR-

>Horse\_AIM2  
KEILLTGLDNITDEELDRFKFLLPDELKVSTAKLENANRTEVANLMIQNVGA  
VSAVTKTIHVFQKL-NYMHVAKSLQE

>Horse\_2  
-

KIVLLKGLEPISAYHFSMVKSLLAHGLQLTAKPQDEYSKIEIAKLMAEKYRGA  
TCVDKLIIDLYKDIPELKS LVKNLR-

>Horse\_3

-

KIVLLKGLEHINDYYFNVVKSLLAHDLGLTTKMQDEYNRIKIAHLIEEKFQGA  
ACVNKLIPELLKDIPE-----

>Horse\_4

KKIILLKGLEPINEYQFSMVKFLASDLKLRKAQNEYNRIQIADLMTENFPRA  
TCVDKLIELYKDIAELKQLAKTLKN

>Horse\_5

KKILLKGLEPISEYHFSIVKSLFAKDLKLTEKAQNEYNRIQIADLMEEFPEG  
ACVDALIDLYKDIAELKDLAKTLK-

>Horse\_6

KRIVLLKGLEPISEYHFSIVKSLLAHDLKLSRKAQNEYNRIQIADLMEVKFRGA  
ACVDALIKLYKDIAELKELAKTLKN

>Human\_POP3

KEILLTSLDNITDEELDRFKCFLPDEFNIATGKLHTLNSTS-SQLDLKRWHGV-  
-CSEEDRIFQKL-NYMLVAKCLRE

>Human\_AIM2

KEILLTGLDNITDEELDRFKFFLSDEFNIATGKLHTANRIQVATLMIQNAGAV  
SAVMKTIRIFQKL-NYMMLAKRLQE

>Human\_IFI16

KNIVLLKGLEVINDYHFRMVKSLLSNDLKLNLKMREEYDKIQIADLMEEKFR  
GDAGLGKLIKIFEDIPTLEDLAETLKK

>Human\_MNDA

KKILLKGFELMDDYHFTSIKSLLAYDLGLTTKMQEEYNRIKITDLMEKKFQG  
VACLDKLIELAKDMPSLKNLVNNLRK

>Human\_PYHIN1

KKIVLLKGLEVINDYHFRIVKSLLSNDLKLNPKMKEEYDKIQIADLMEEKFPG  
DAGLGKLIIEFFKEIPTLGDLAETLKR

>Mouse\_AI607873

KRIVLLKGLECINKHHFSLFKSLLARDLSLERDNQEKYSTIQIANMMEEKFKP  
DAGLGELIEFCEKVPALRKRAEILKK

>Mouse\_AIM2

--

MLLLTGLDHITEELKRFKYFALTEFQIARSTLDVADRTELADHLIQSAGAAS  
AVTKAINIFQKL-NYMHIANALE-

>Mouse\_IFI214

KRIVLLTGLMGINDHDFRMVKSLLSKELKLNKMQDEYDRVKIADLMEDKFP  
KDAGVVQLIKLYKQIPGLGDIANKLKN

>Mouse\_IFI203

KNIVLLKGLNEMEDYQFRTVKSLLRKELKLTCKMQEDYDRIQLADWIEDKFP  
KDAGLDKLIKVCEHIKDLKDLAKKLLK-

>Mouse\_IFI204

KRIVLLRGLECINKHYFSLFKSLLARDLNLERDNQEYTTIQIANMMEEKFPA  
DSGLGKLIAFCEEVPALRKRAEILKK

>Mouse\_IFI205

-

RLVLLGLECINKHQFNLFKSLMVKDLNLEEDNQEKYTTFQIANMMVKKFPA  
DAGLDRLINFCERVPTLKKRAEILKK

>Mouse\_MNDA  
KRIVLLRGLLECINKHYFSLFKSLLARDLNLERDNQEYTTIQIANMMEEKFPA  
DSGLGKLI EFCEEVPALRKRAEILKK  
>Mouse\_MNDAL  
KKIVLLKGL ES MEDYQFRTVKSLLRKELKLTKKLQEDYDRIQLADWMEDKFP  
KYAGLDKLIKVCEHIKDLKDLAKKLLK-  
>Mouse\_PYDC3  
KQIVLLSGLEYMNDYNFRALKSLLNHDLKLTKNMQDDYDRIKIADLMEEKFP  
EDAGLSKLI EVCEDIPELAARVDILR-  
>Mouse\_PYDC4  
KQIVLLSGLEYMNDYNFRALKSLLNHDLKLTKNMQDDYDRINIADLMEEKFP  
EDAGLSKLI EVCEDIPELAARVDILR-  
>Mouse\_PYDC1  
KQIVLLSGLEYMNDYNFRALKSLLNHDLKLTKNMQDDYDRIKIADLMEEKFP  
EDAGLSKLI EVCEDIPELADHVDILRK  
>Mouse\_PYHIN1  
KRIVLLTGLMGINDHDFRMVKSLLSKELKLNRMQDQYDRVKIADLMEDKFP  
KDAGVDQLIKLYKQIPGLGDIANKLKN  
>Opossum\_1  
---ILLSGLEELQNE DFKKFKFFLSNDCLMMR--  
VHNLDRIDLATCMKKQLPCPSFMNKFIEILKKM-NLNETAKKYK-  
>Pig\_1  
KKIILLKGLEKIDEYHFSMIKSLLAHDLELTREMQDNYDRVKIADLMELKFPGI  
TCVNILEELLSDMIK-----  
>Pig\_2  
KRIVLLKGFQHMDDYHFKMIKSLLAHDRLRLTRKMQEYDRIKIADLMEEFR  
GAACVDKLI ELVKGIDDIKHLVKPLQ-  
>Rat\_AIM2  
--  
MLLLTGLDHIT EELKRFKYLALTEFNIPRKT LN IADRTELADQLIQSAGAASA  
VAKAISIFQKL-NYMDIAKALE-  
>Rat\_2  
KKIVLMFGLERINDYNFR TLK SLLTHDLKLTQKMQDDYDRIKIADLMEEKFPE  
DAGLSKLI EWEGIPEFEDHADTLRK  
>Rat\_3  
KRIVLLKGLEPLSSHHSFLFKSLLASDLKLERHMQEYTKVQIADMMEDEFDP  
DAGLGKFIKFCEDLPALRKRAEILKR  
>Rat\_4  
KEIVLIKGLEDMKDYAFRTIKSLLRKELNLTKKMQDDYDRIQLADLLEDKFPQ  
DAGLSKLI EVCESIEELKELTDNLKR  
>Tasmanian\_devil\_1  
---  
ILLES TELDEEEFKICKYHLKNRGLIIRMEGKGDRTDIAESMKAKFGAVSALK  
HITNVFKKMNLNEIVENLQ-  
>Parnell's\_mustached\_bat  
QEVLLLTGLDNITDEELDRFKIFFPDEFITPTGKLEYAYRTR--  
KPTIKNSSVVS VLMKNI-IFQKL-NYRHVLQKVSE
